# Supplementary material for: Genome-wide association study of school grades identifies genetic overlap between language ability, psychopathology and creativity
Source: PubMed Central journal article supplement (PMC9829693; doi:10.1038/s41598-022-26845-0), 2023-01-09

## Supplementary dataset 1 | Regional association plots

The regional association plots of the seven genome-wide loci (four for E1, two for E2 and one for E3) are in this file. The plots are made using online tool, LocusZoom ([locuszoom.org](http://locuszoom.org)). Genotypes of 1000g Phase 3 European subset were used for LD calculation.

In all the plots, in the X axis basepair positions (hg19), in the left Y axis  $-\log_{10} P$  values and in the right Y axis recombination rates are plotted. The index variant (i.e. the most significant variant) is shown as a diamond and is labelled. The points are colored according to their LD ( $r^2$ ) with the index variant. The genes located within the regions are displayed as gene tracks (thick line correspond to exon and thin line, intron). The arrowed end correspond to the 3' end of the gene.

# GWAS of E1, Locus 2q11.2

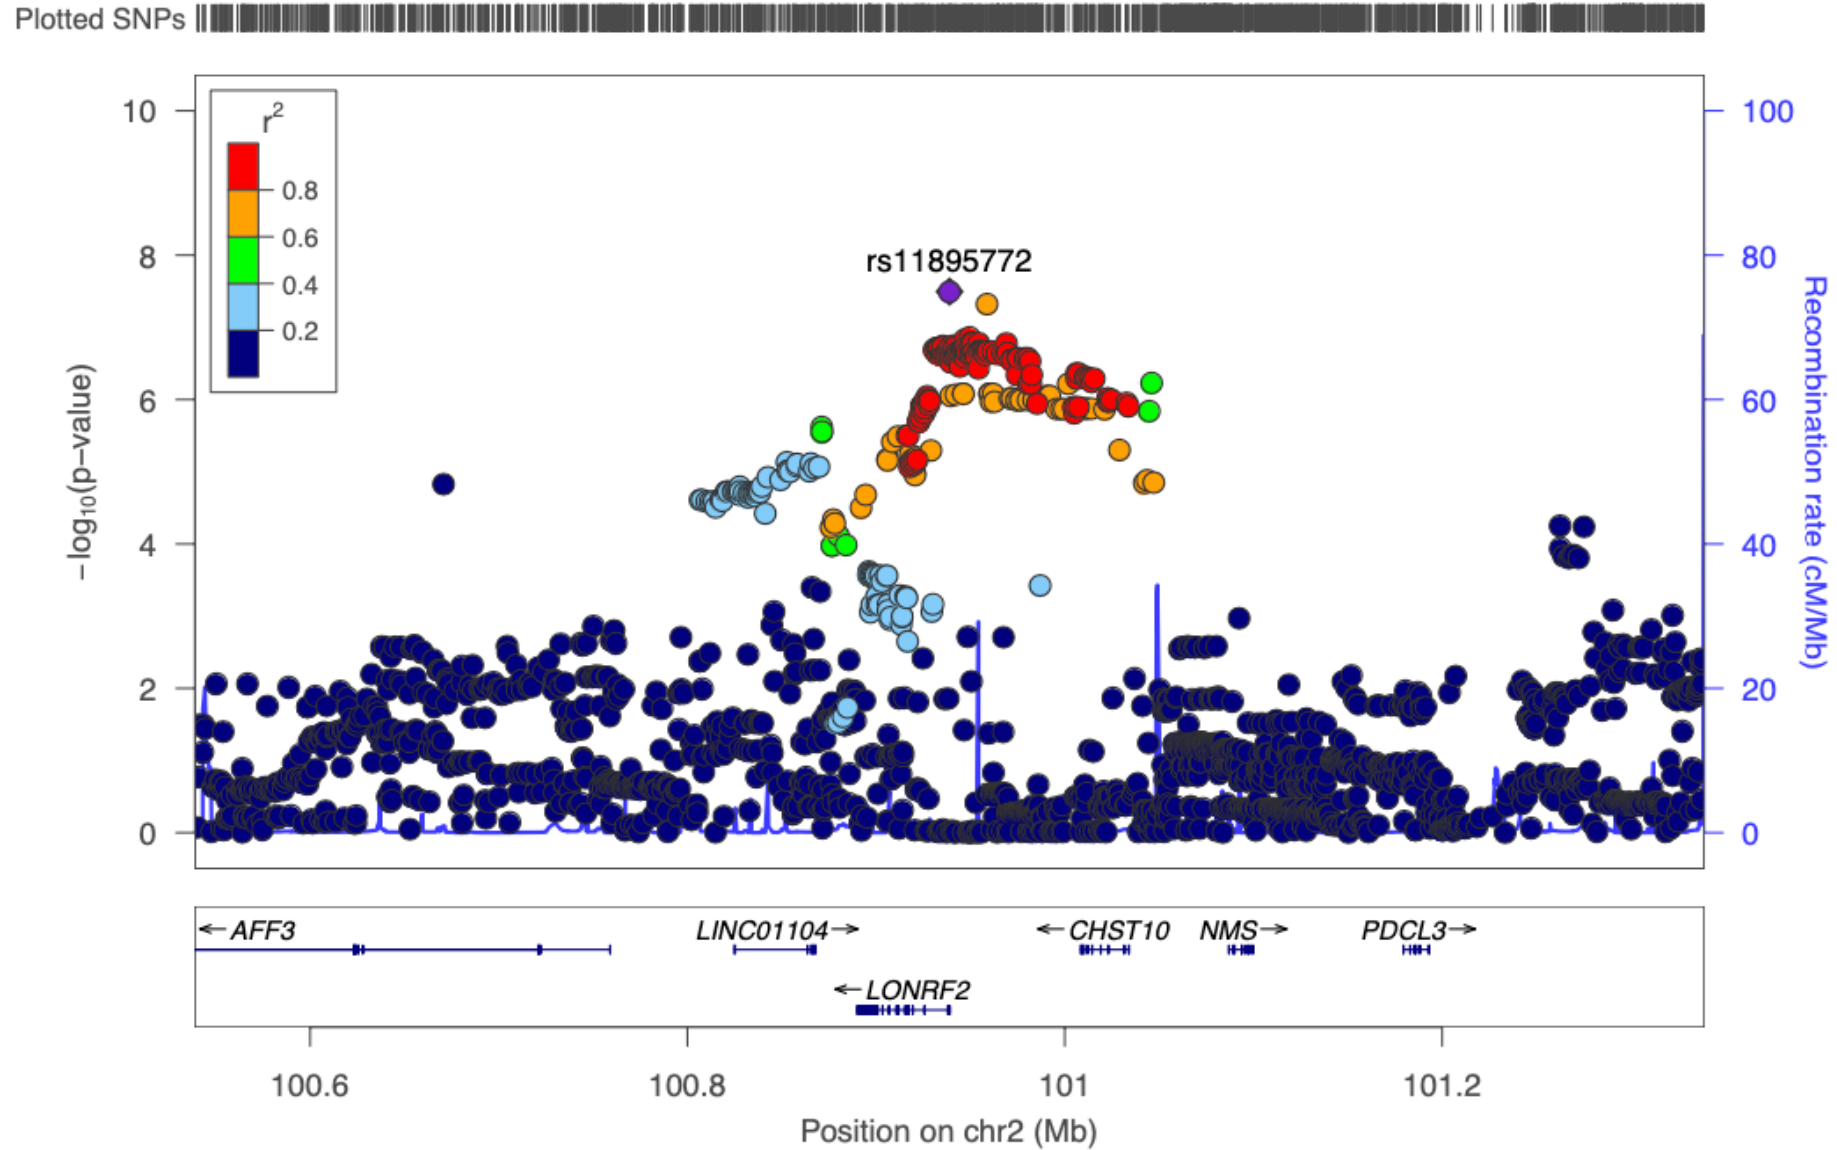

# GWAS of E1, Locus 3p21.31

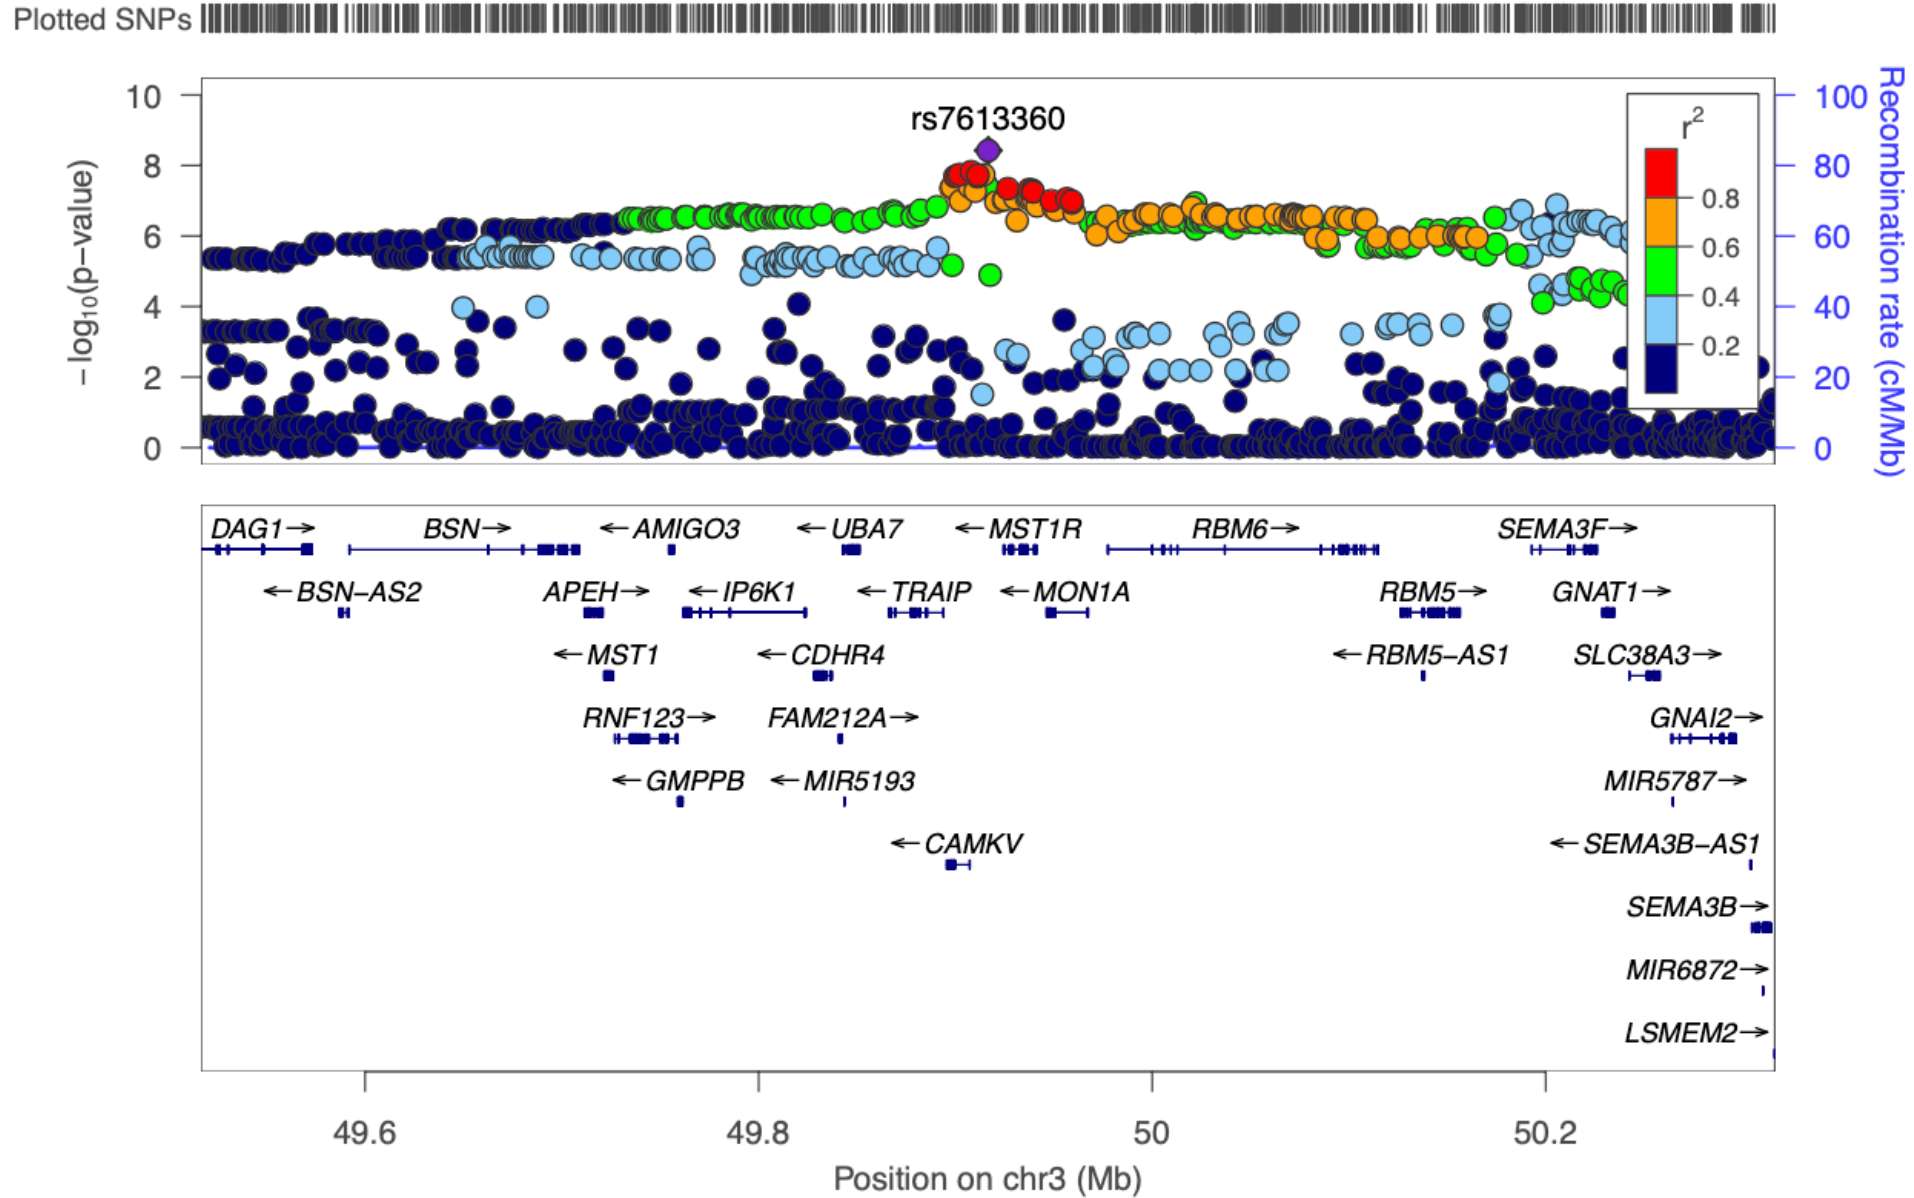

# GWAS of E1, Locus 5p13.2

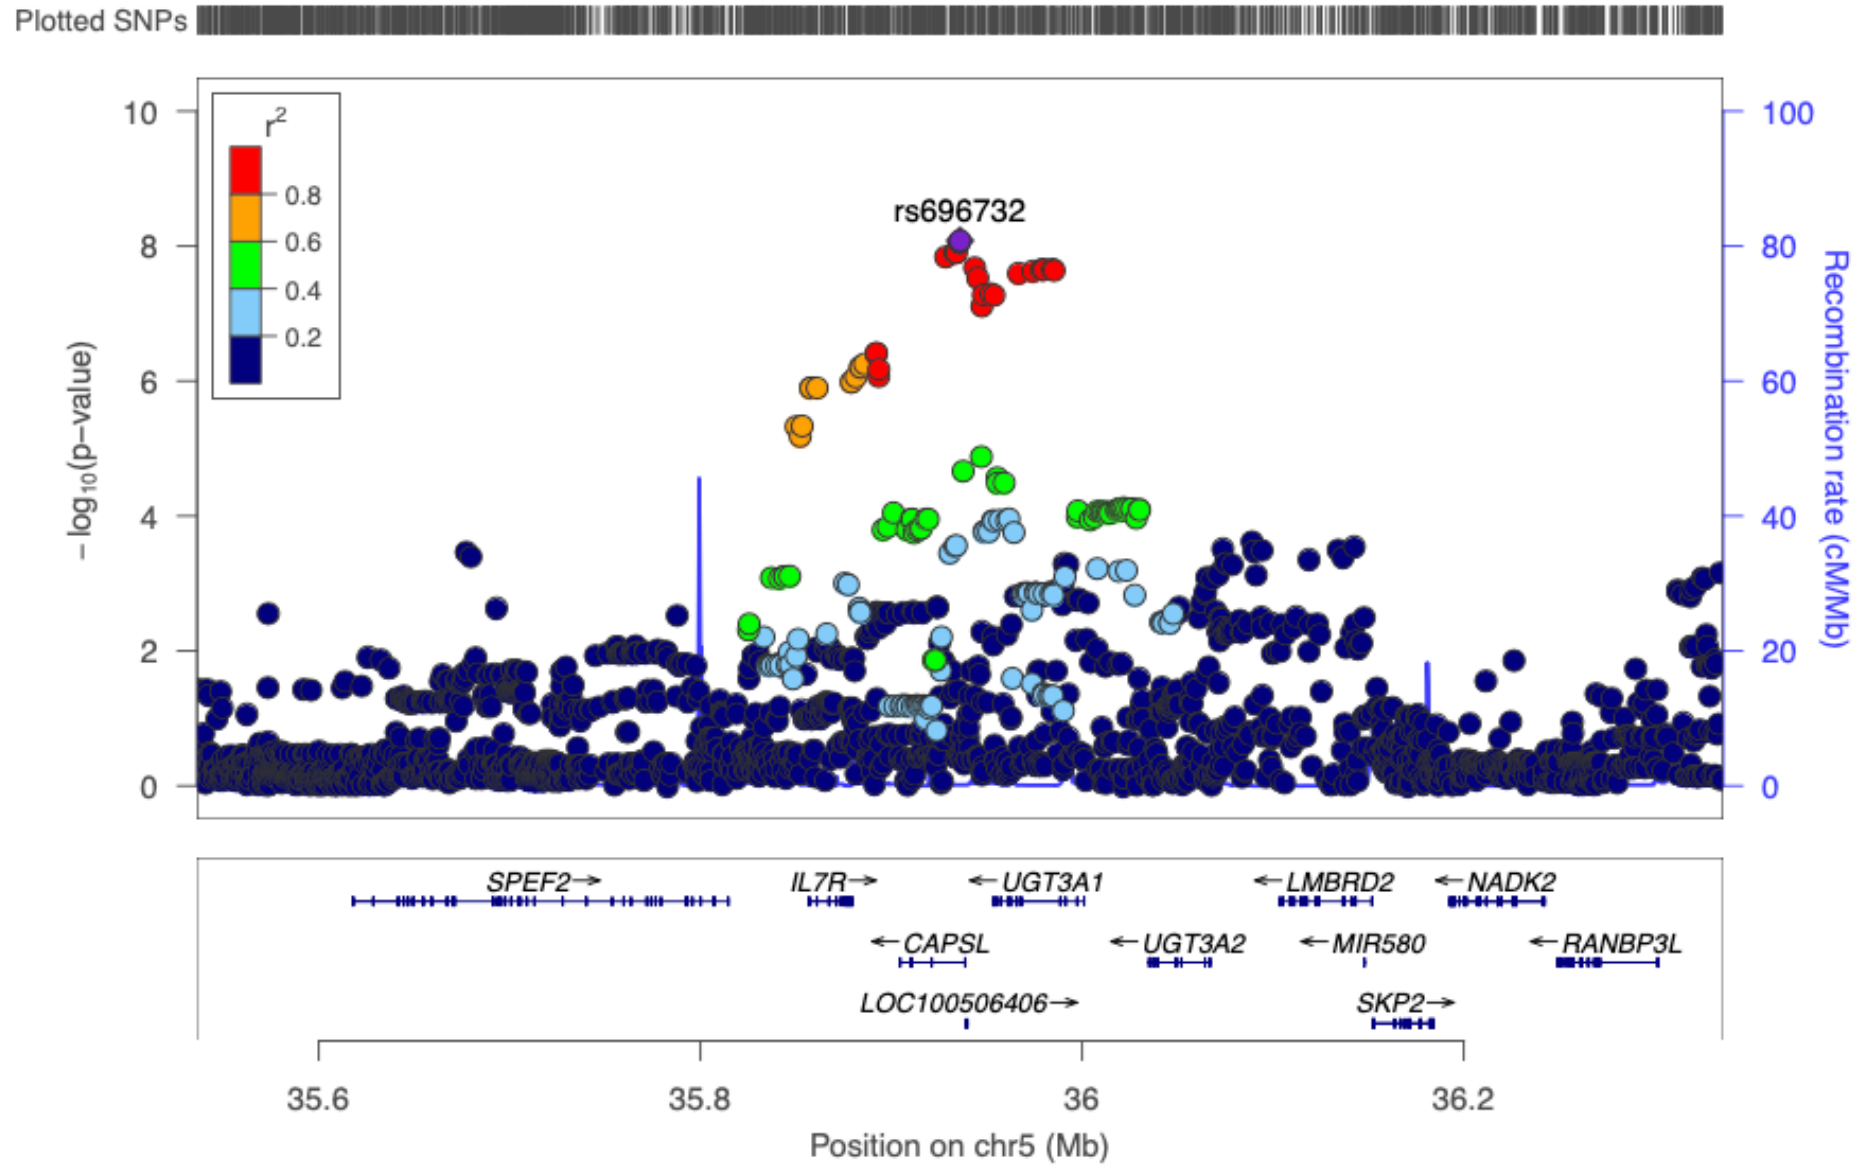

# GWAS of E1, Locus 6q16.1

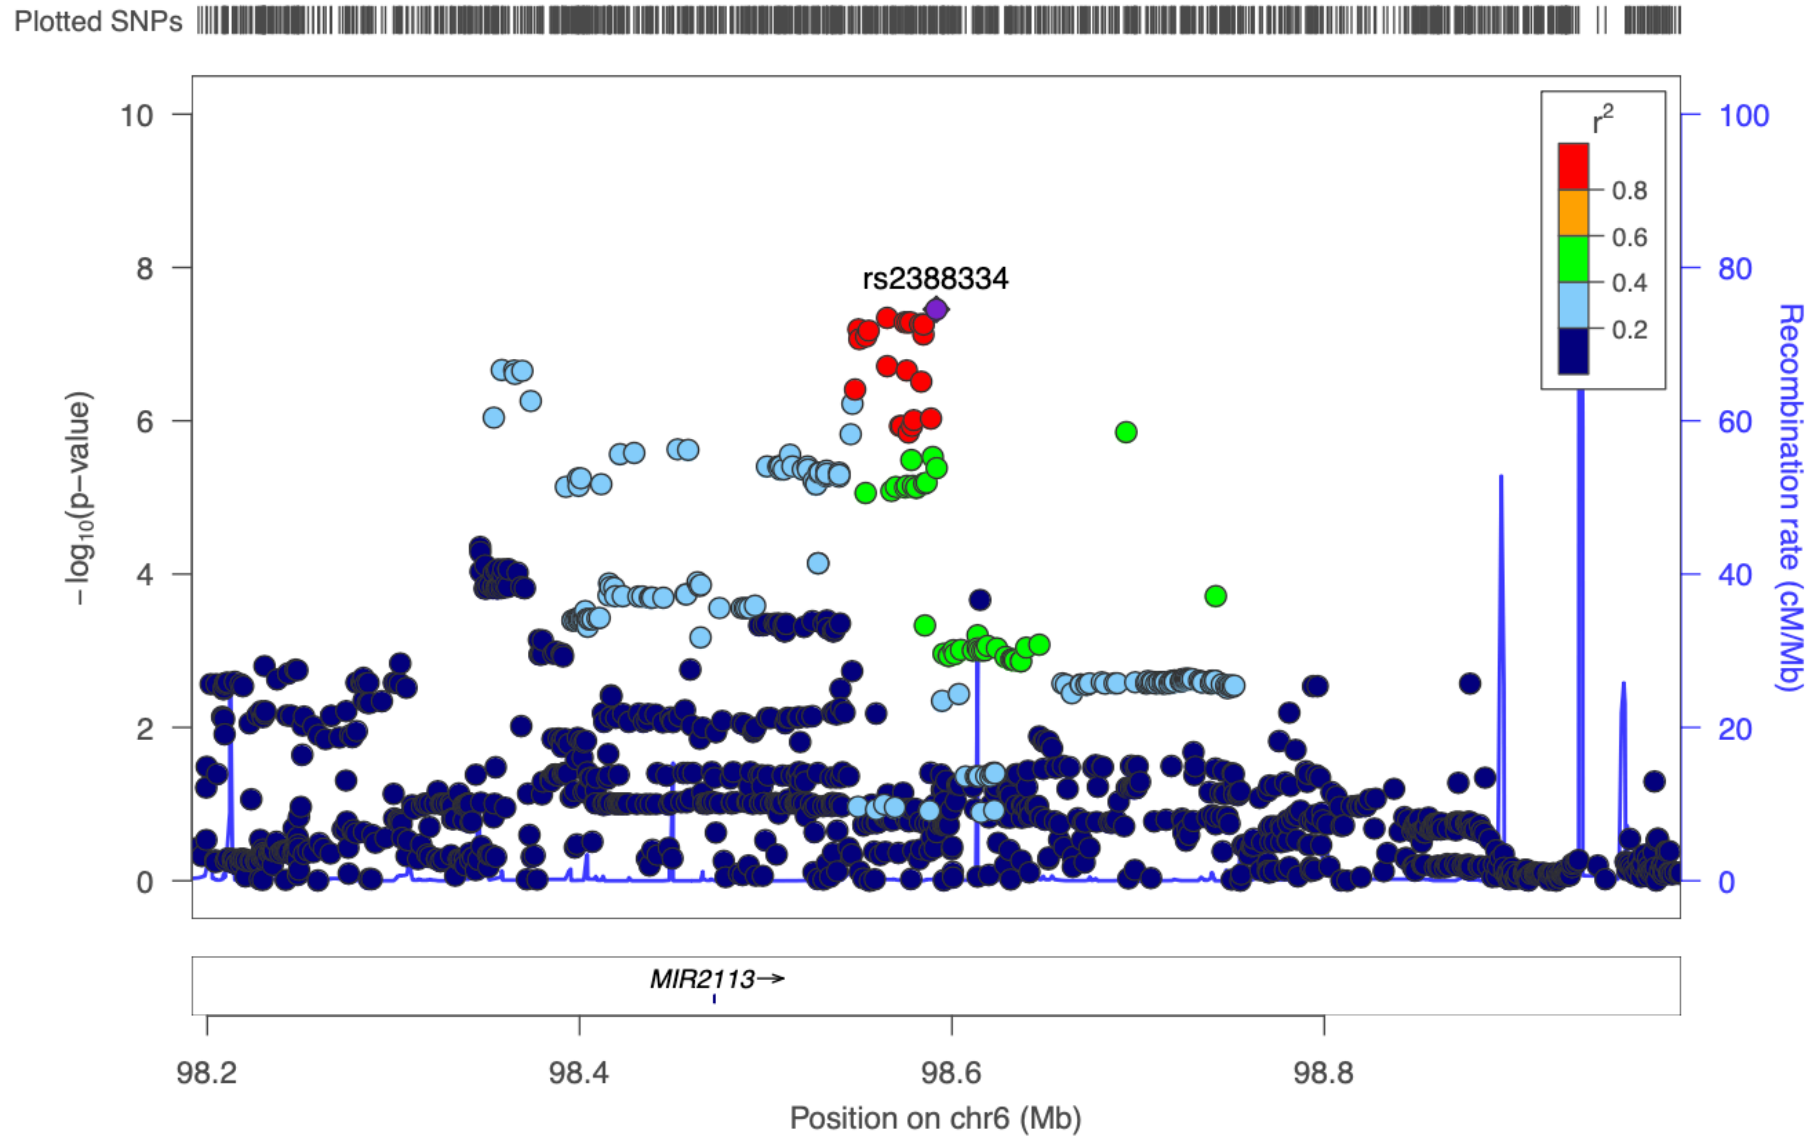

# GWAS of E2, Locus 11q23.2

Plotted SNPs

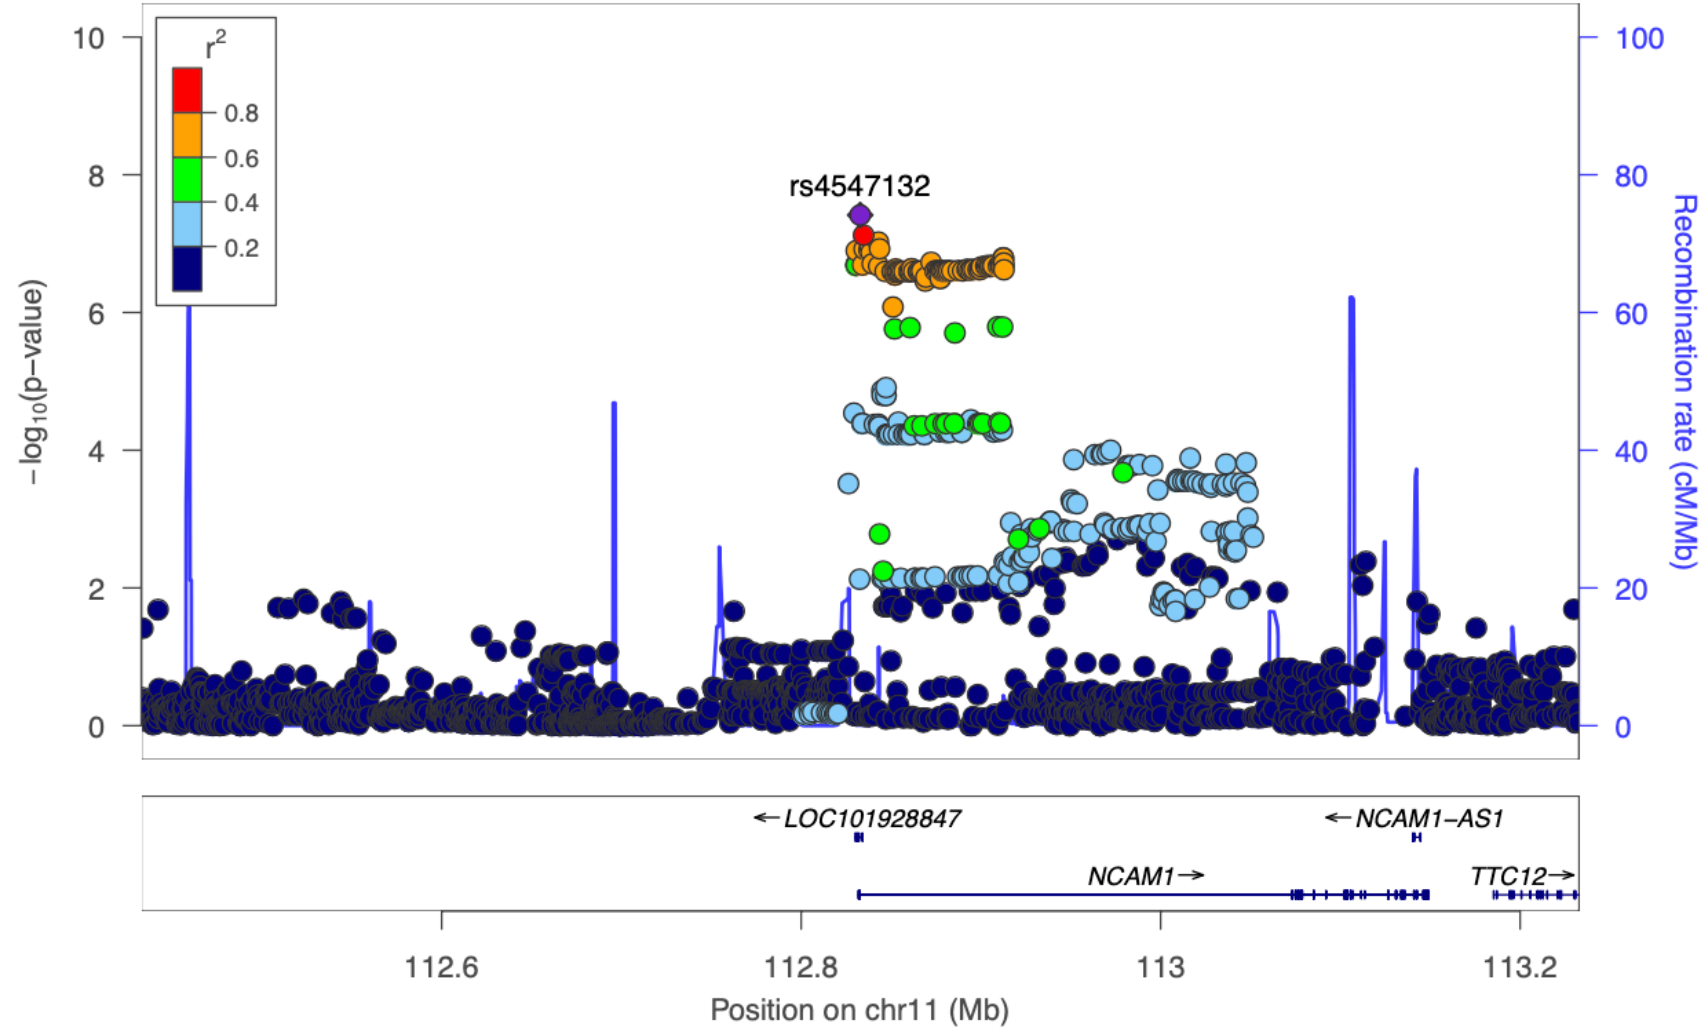

# GWAS of E2, Locus 16q23.3

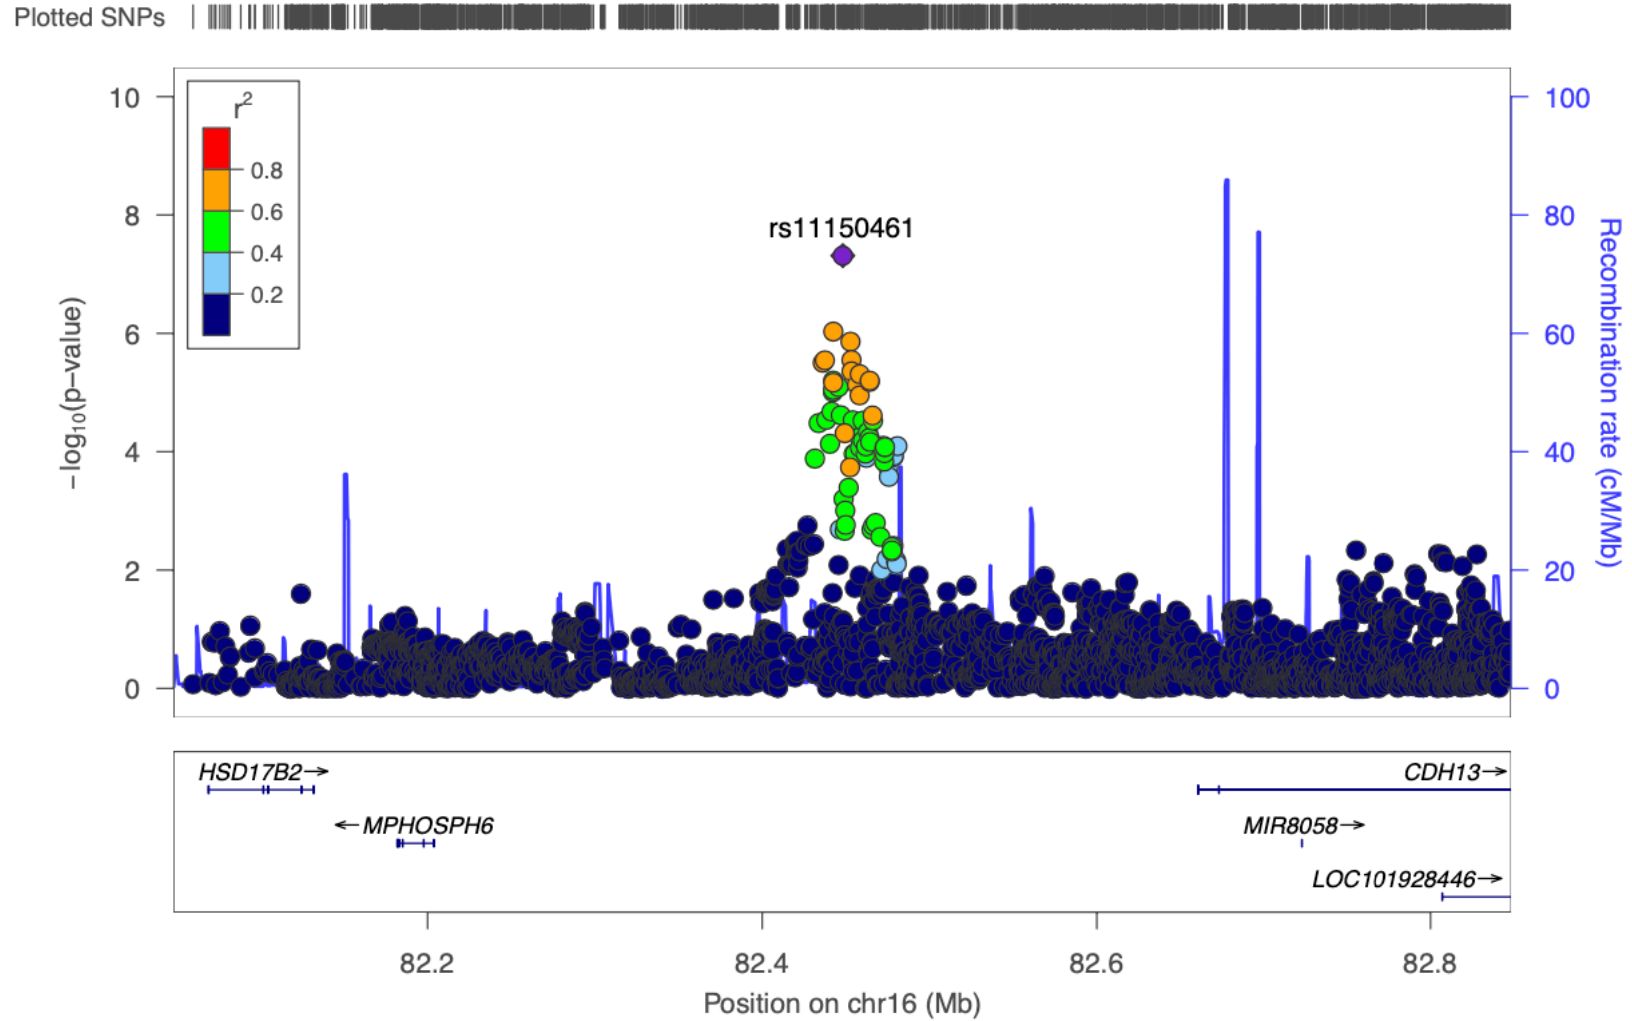

# GWAS of E3, Locus 16q22.1

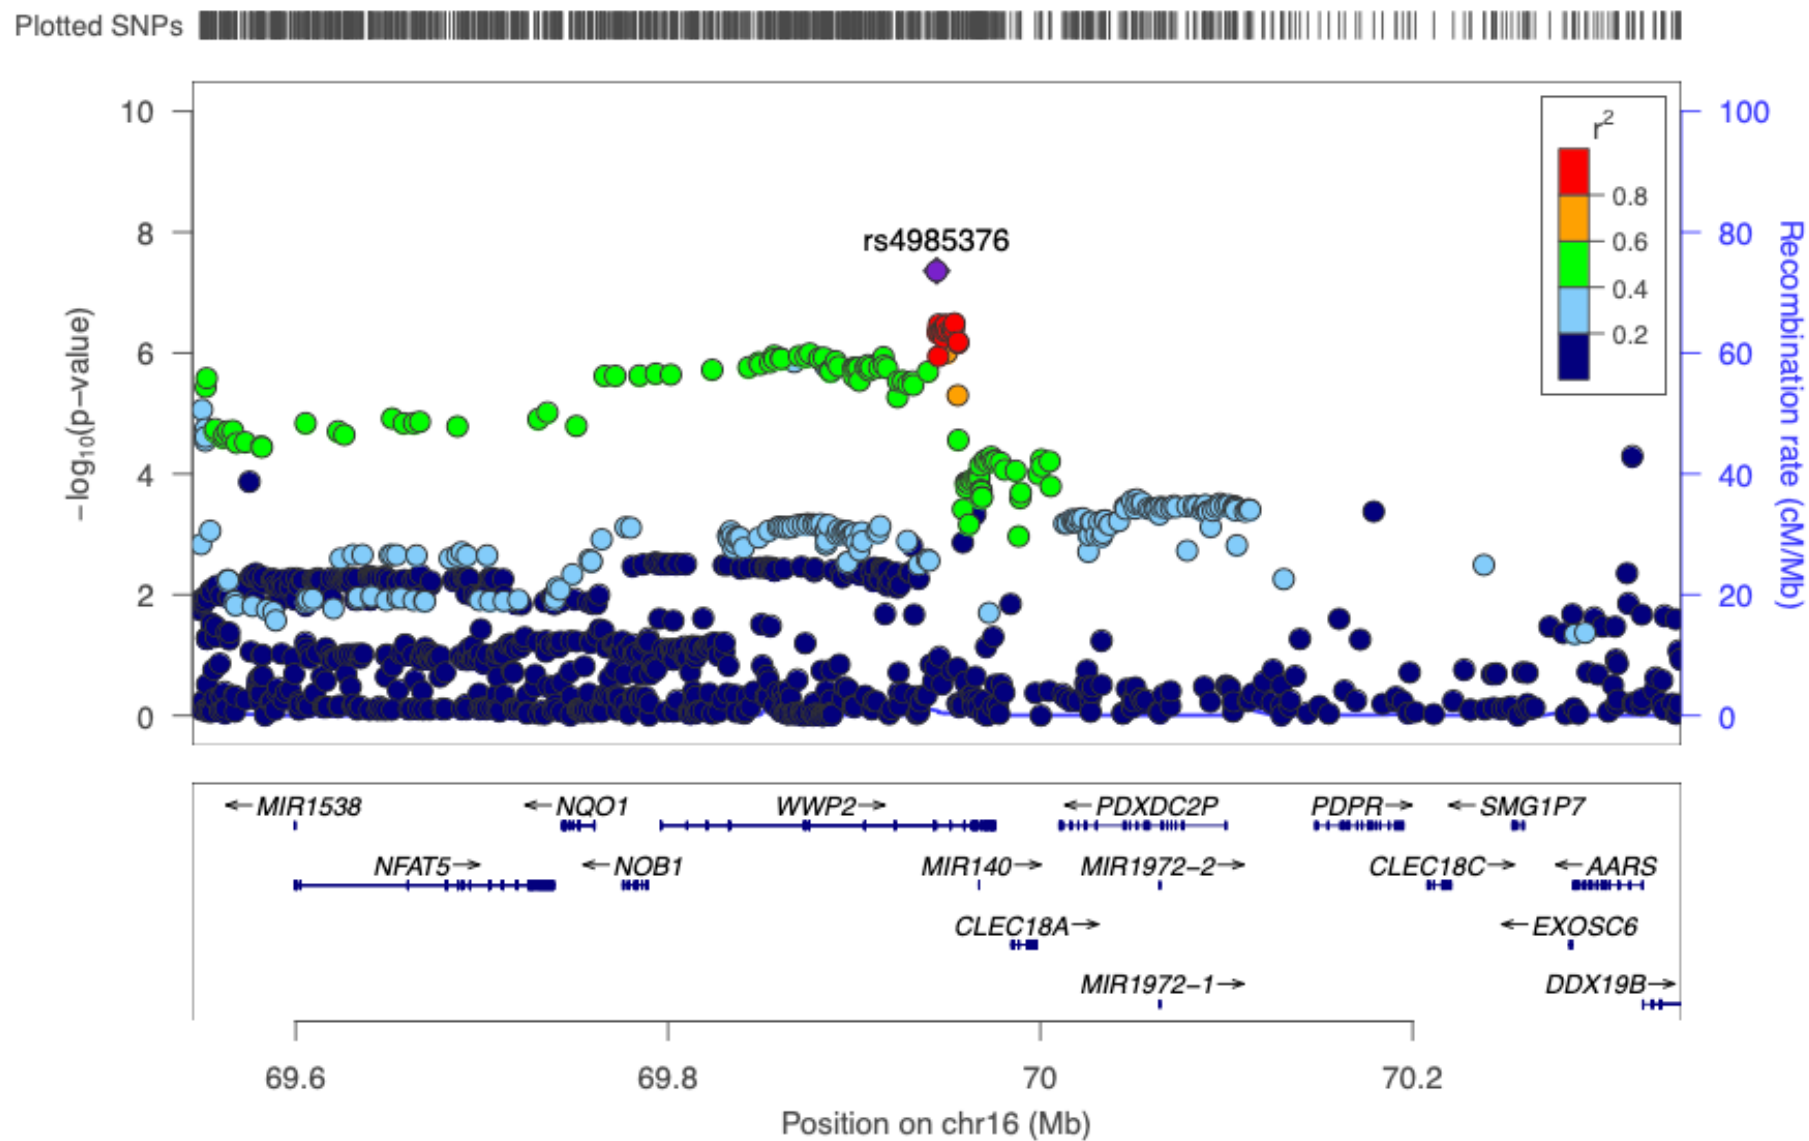

Supplement: 41598_2022_26845_MOESM3_ESM.pdf [file 41598_2022_26845_MOESM3_ESM.pdf]
