# Supplementary material for: Genome-wide association study of school grades identifies genetic overlap between language ability, psychopathology and creativity
Source: PubMed Central journal article supplement (PMC9829693; doi:10.1038/s41598-022-26845-0), 2023-01-09

## **Supplementary dataset 2 | Phenome-wide association plots.**

The PheWAS plots of seven variants are in this file. The seven variants are index variants in the genome-wide loci identified in this study--four for E1, two for E2 and one for E3. The PheWAS was done using GWASatlas online tool ([atlas.ctglab.nl](https://atlas.ctglab.nl)). Totally 4756 phenotypes were included. Only associations that are statistically significant after multiple testing correction ( $P < 1.05 \times 10^{-5}$ ) were shown in the plots. Not all points can be labelled. Hence, only relevant phenotypes or phenotypes considered as interesting were labelled.

**Phenotype: E1**  
**Variant ID: rs7613360**

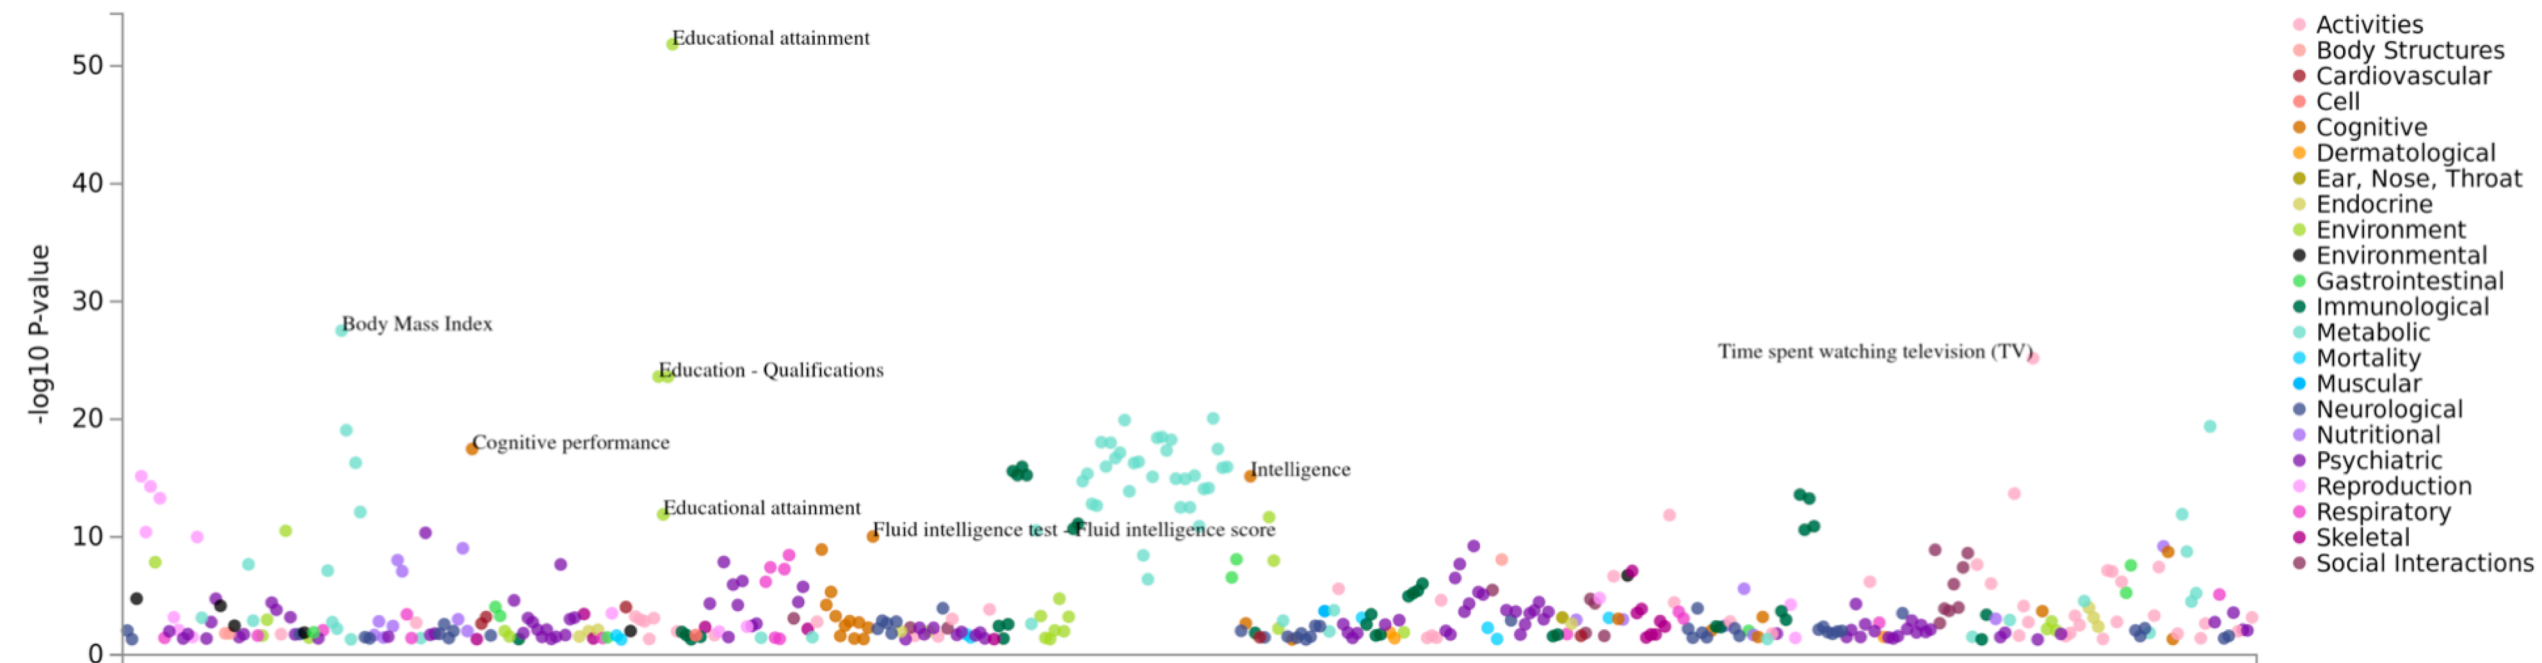

Phenotype: E1

Variant ID: rs2388334

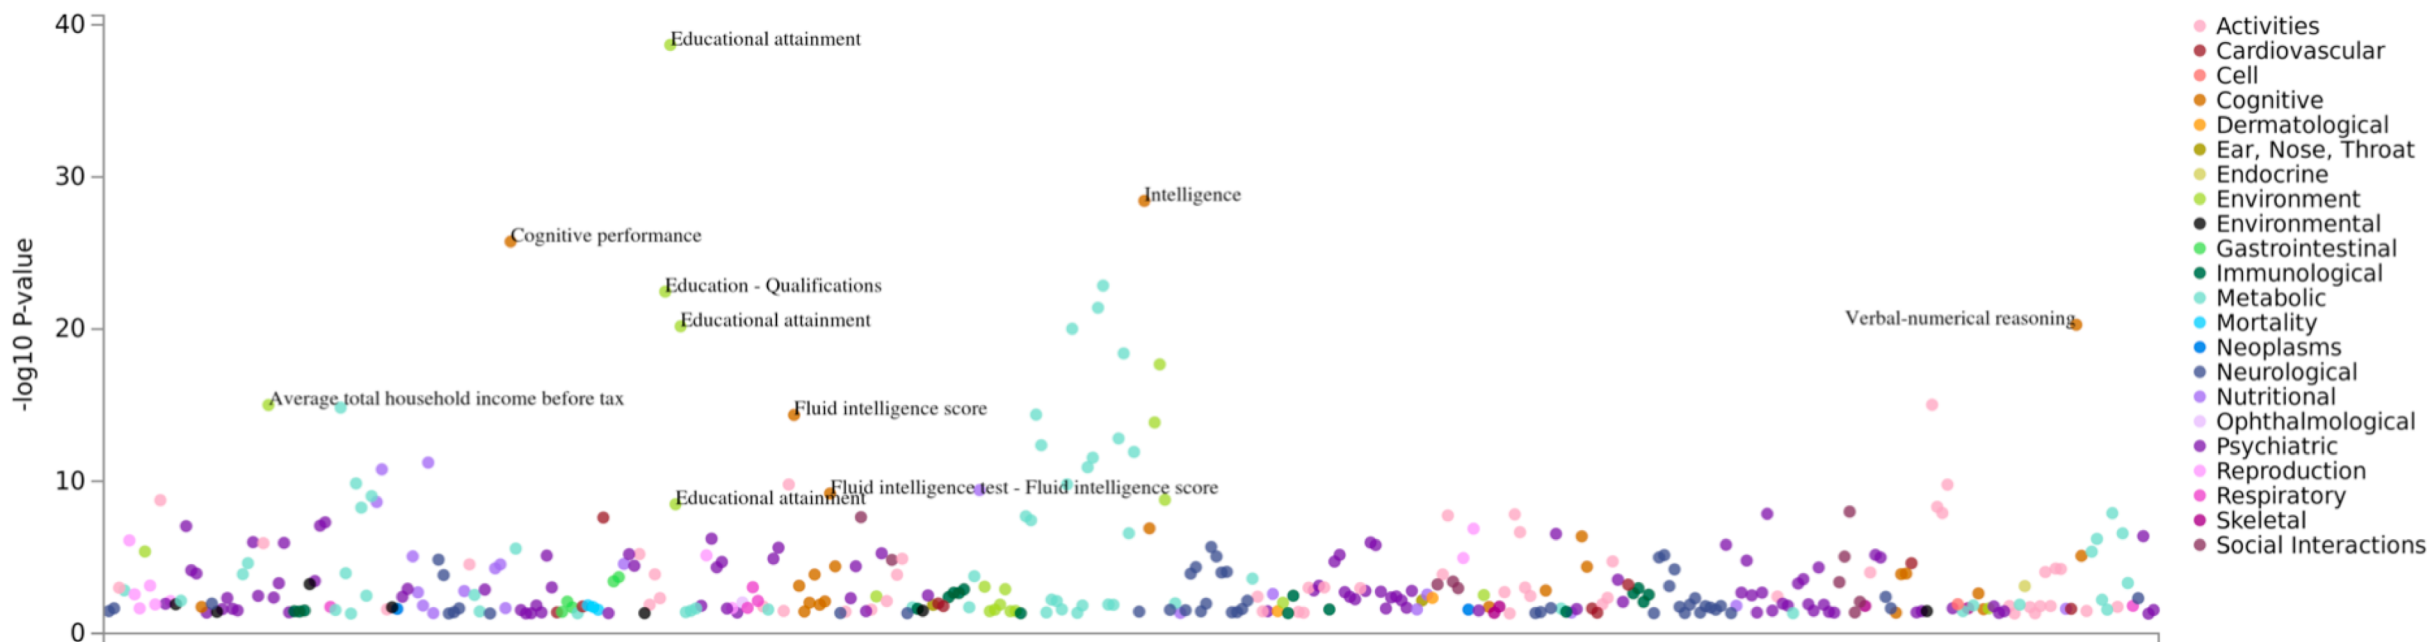

Phenotype: E1

Variant ID: rs11895772

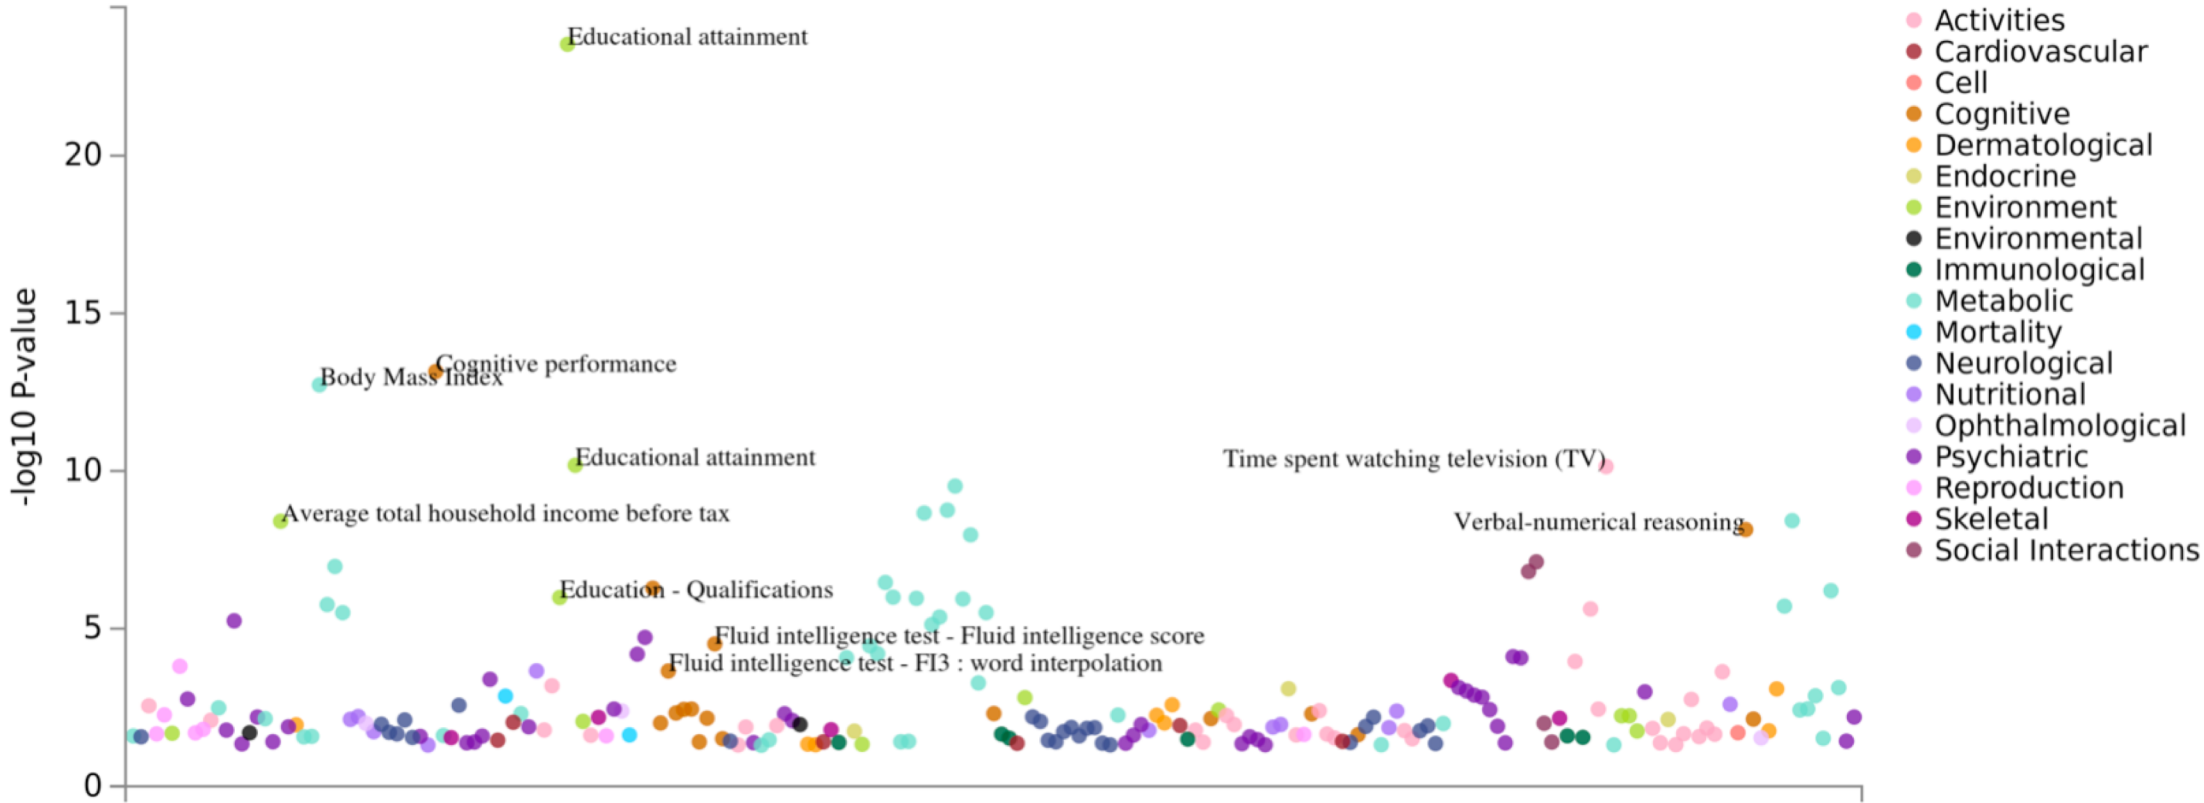

Phenotype: E1

Variant ID: rs696732

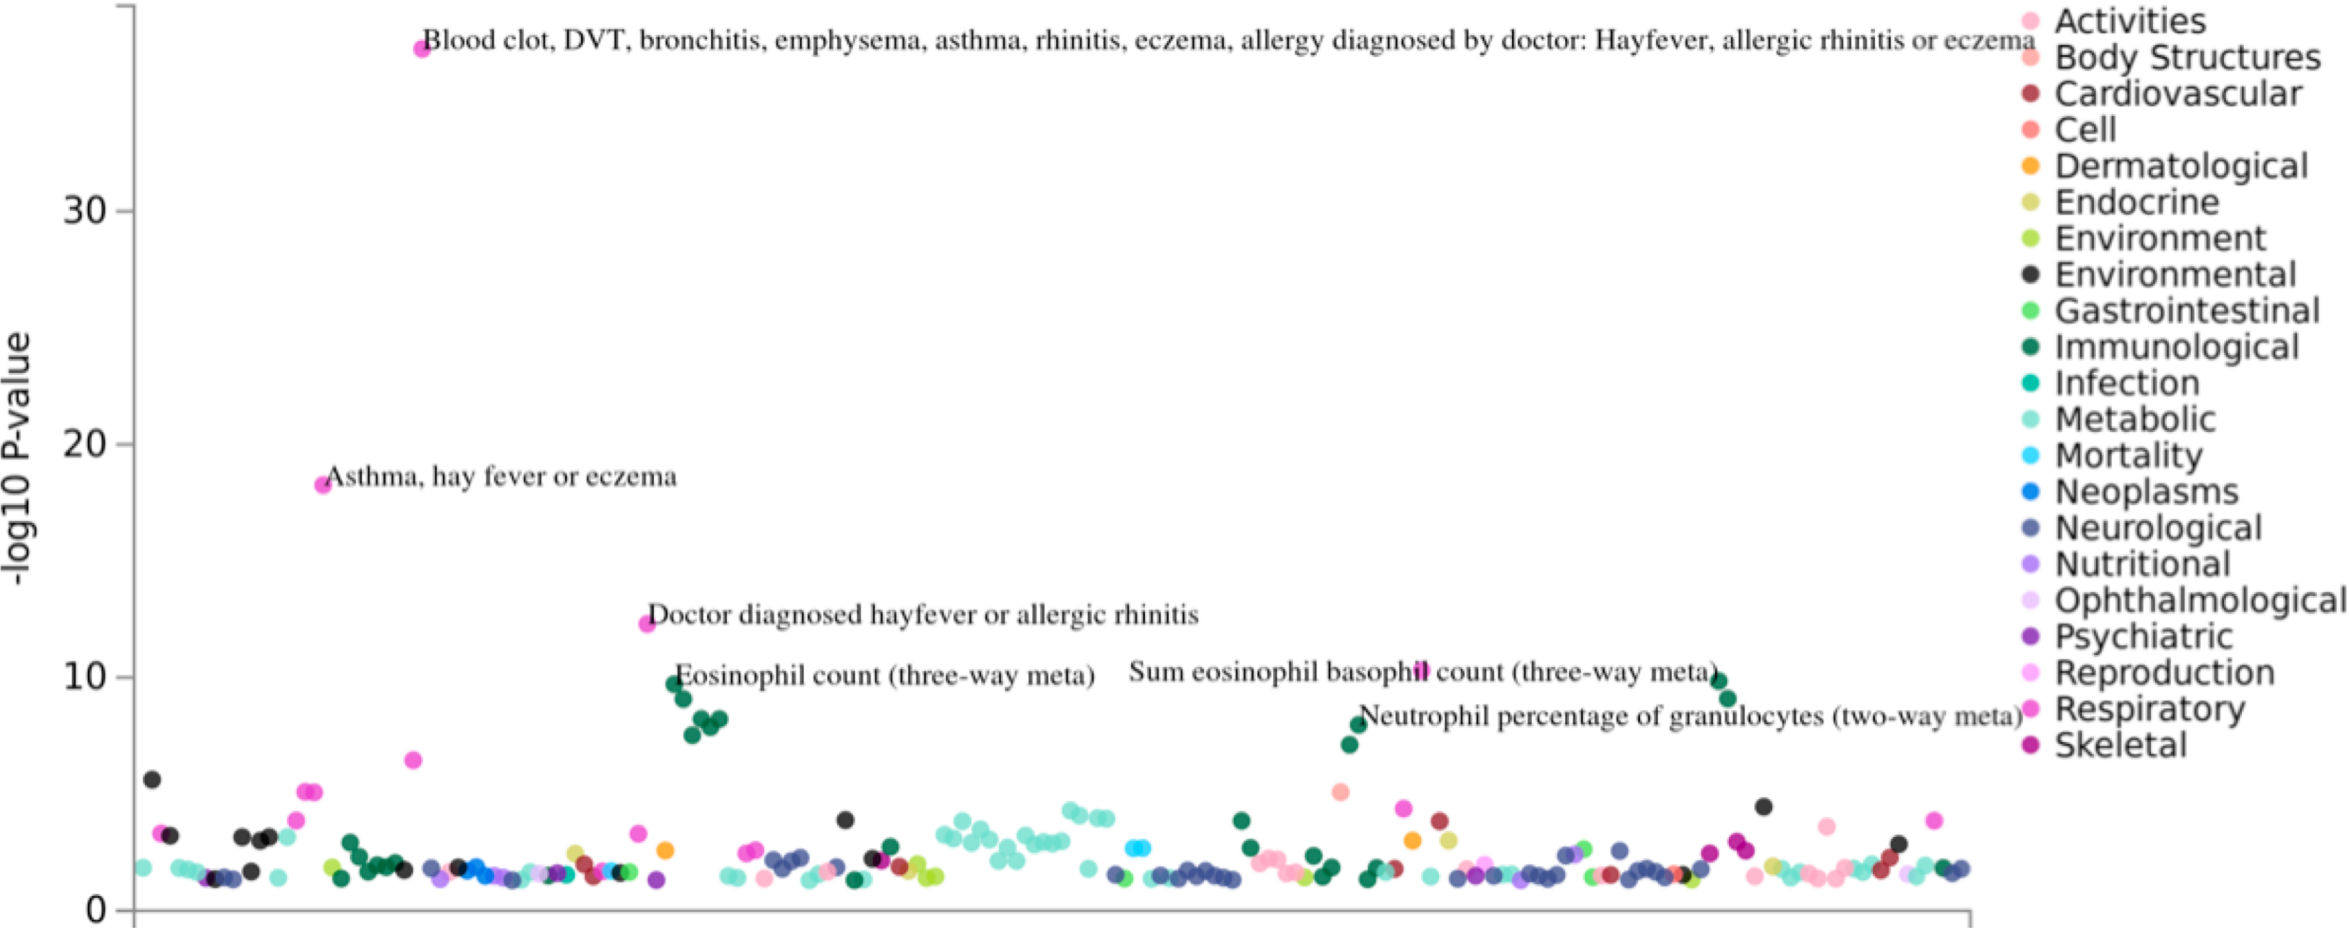

**Phenotype: E2**

**Variant ID: rs4547132**

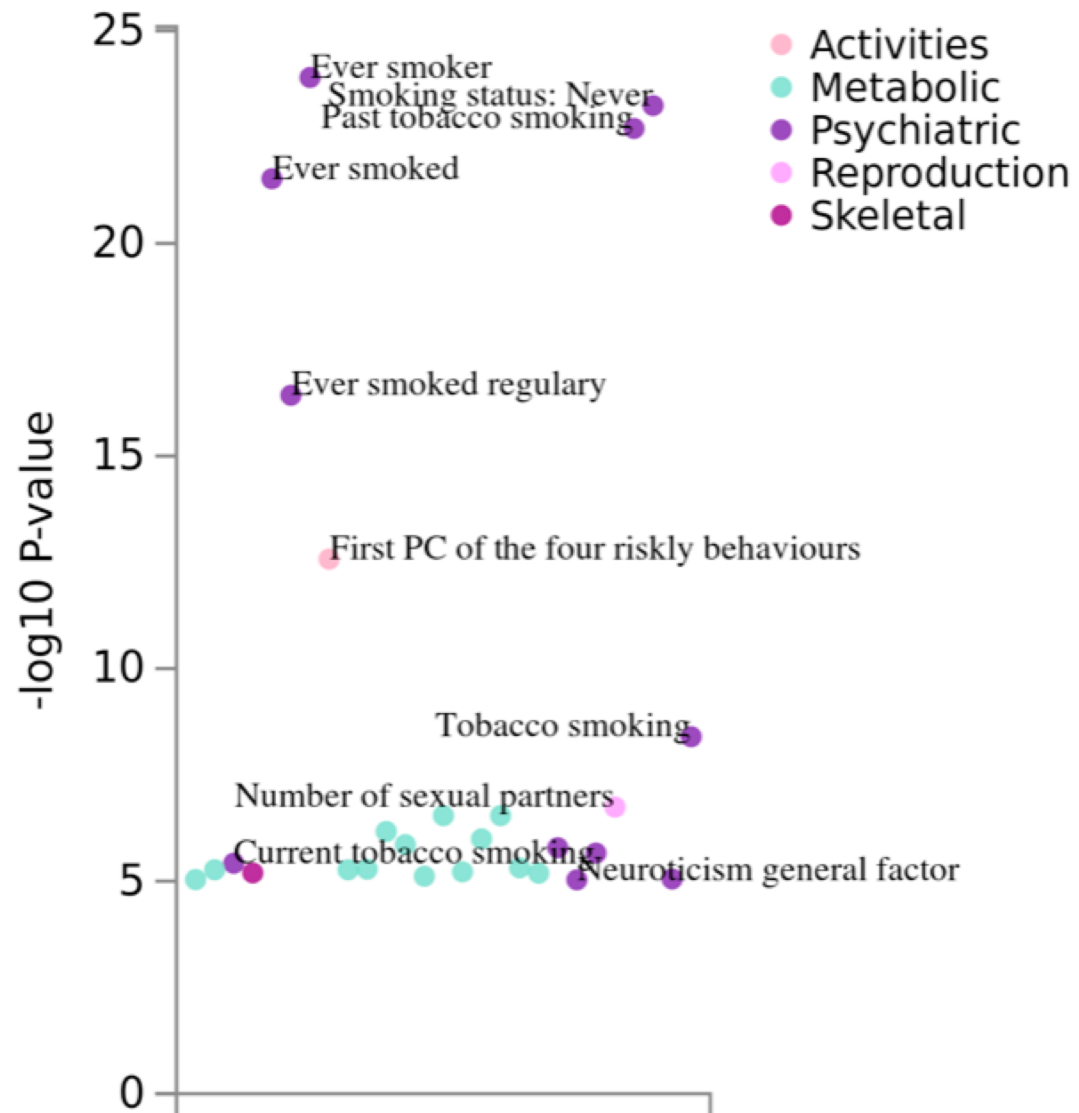

Phenotype: E2

Variant ID: rs11150461

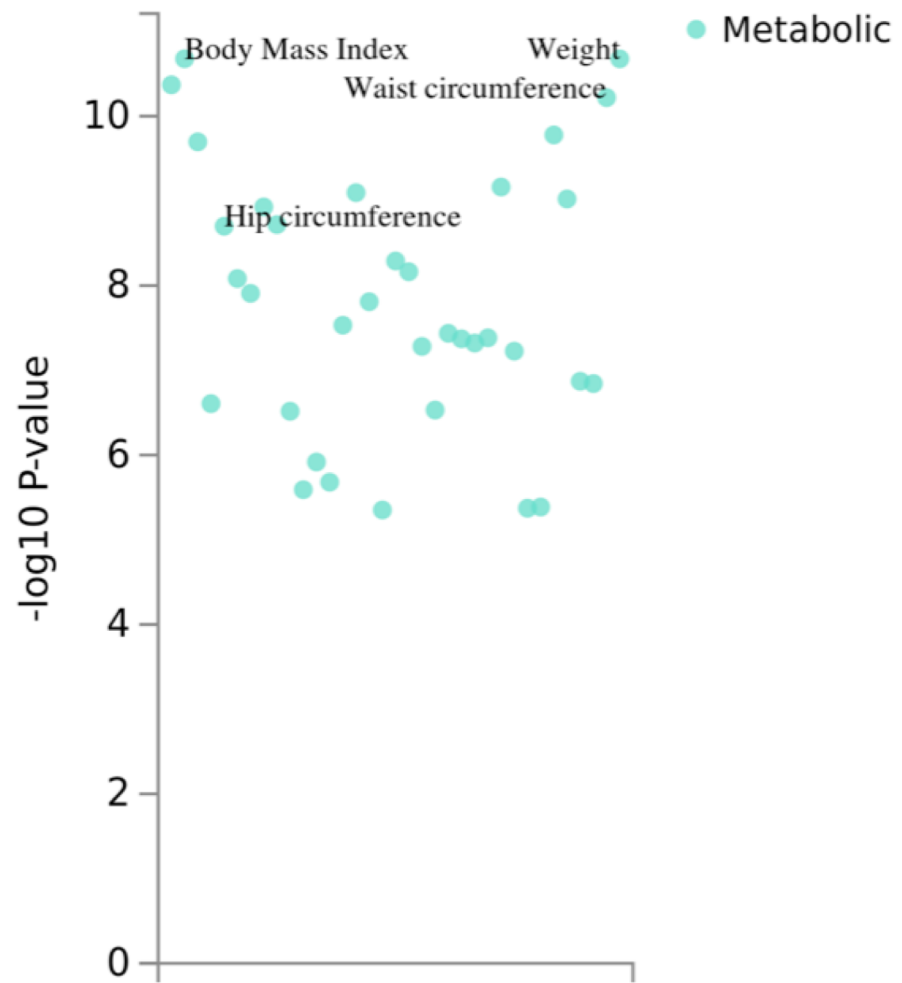

# Phenotype: E3

Variant ID: rs696732

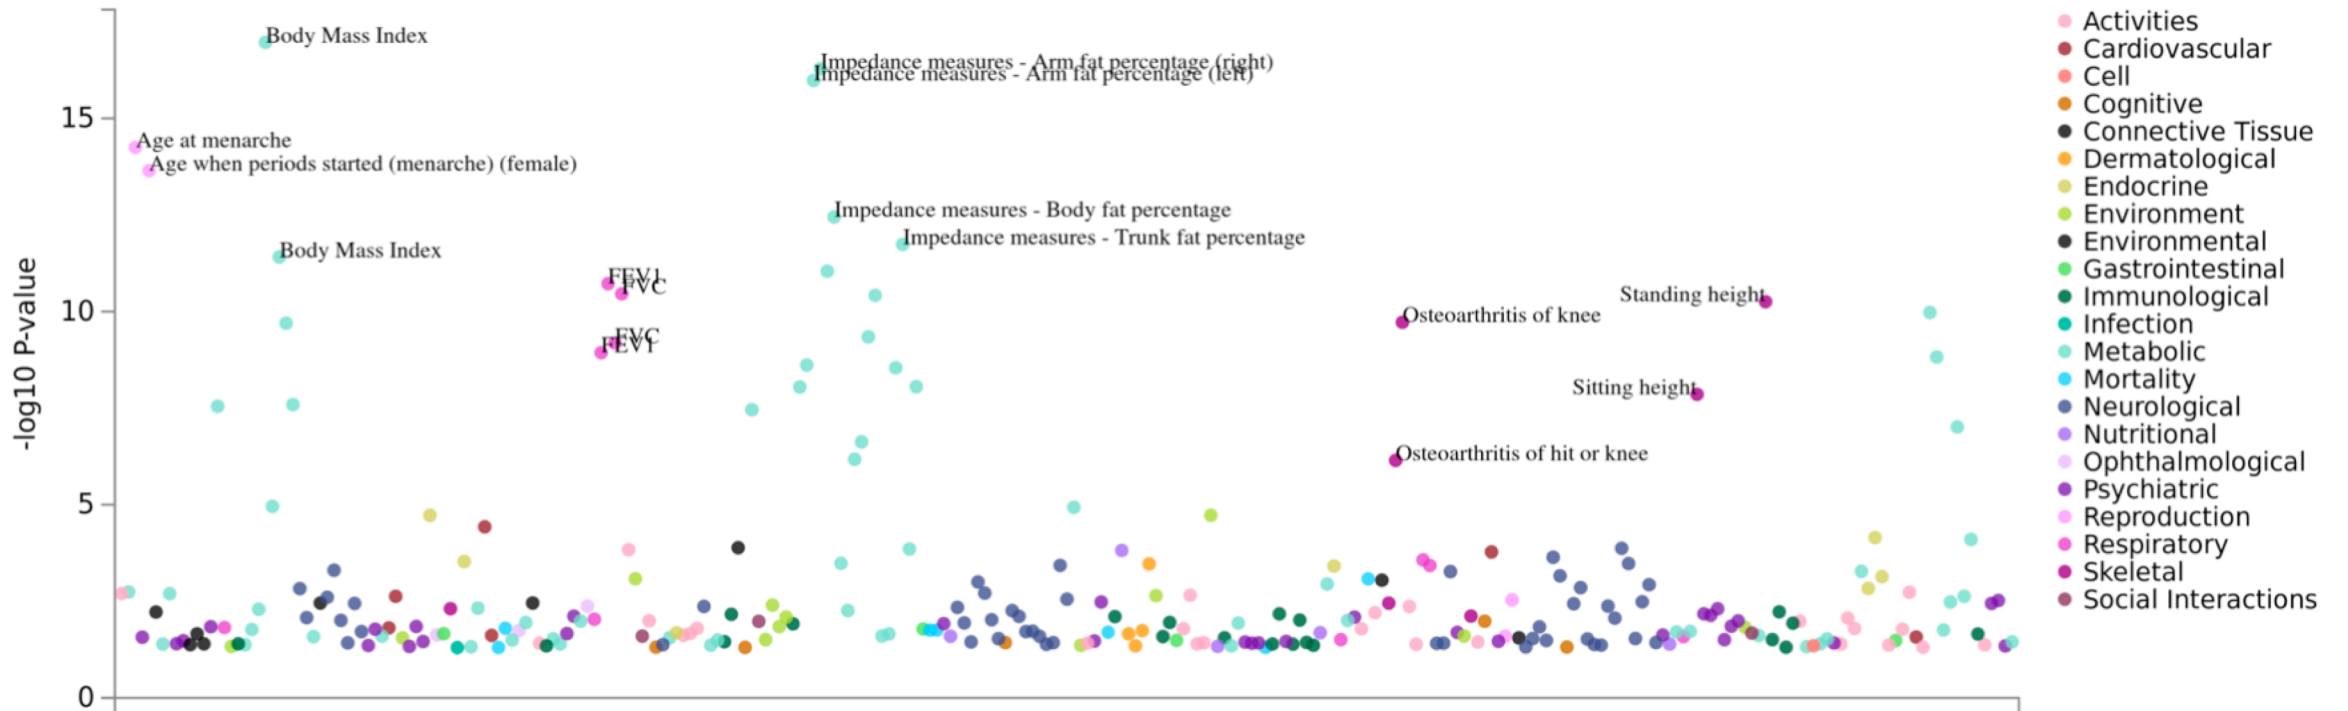

Supplement: 41598_2022_26845_MOESM4_ESM.pdf [file 41598_2022_26845_MOESM4_ESM.pdf]
